# Supplementary material for: Neoadjuvant Gene-Mediated Cytotoxic Immunotherapy for Non-Small-Cell Lung Cancer: Safety and Immunologic Activity
Source: PubMed Central journal article supplement — Mol Ther. 2020 Nov 5;29(2):658–70. doi: 10.1016/j.ymthe.2020.11.001 (PMC7854297; doi:10.1016/j.ymthe.2020.11.001), 2020-11-05
Supplement: mmc1.pdf [file mmc1.pdf]

## **Supplemental Information**

### **Neoadjuvant Gene-Mediated Cytotoxic Immunotherapy for Non-Small-Cell Lung Cancer: Safety and Immunologic Activity**

**Jarrold D. Predina, Andrew R. Haas, Marina Martinez, Shaun O'Brien, Edmund K. Moon, Patrick Woodruff, Jason Stadanlick, Christopher Corbett, Lydia Frenzel-Sulyok, Mitchell G. Bryski, Evgeniy Eruslanov, Charuhas Deshpande, Corey Langer, Laura K. Aguilar, Brian W. Guzik, Andrea G. Manzanera, Estuardo Aguilar-Cordova, Sunil Singhal, and Steven M. Albelda**

Figure S1. CONSORT Diagram

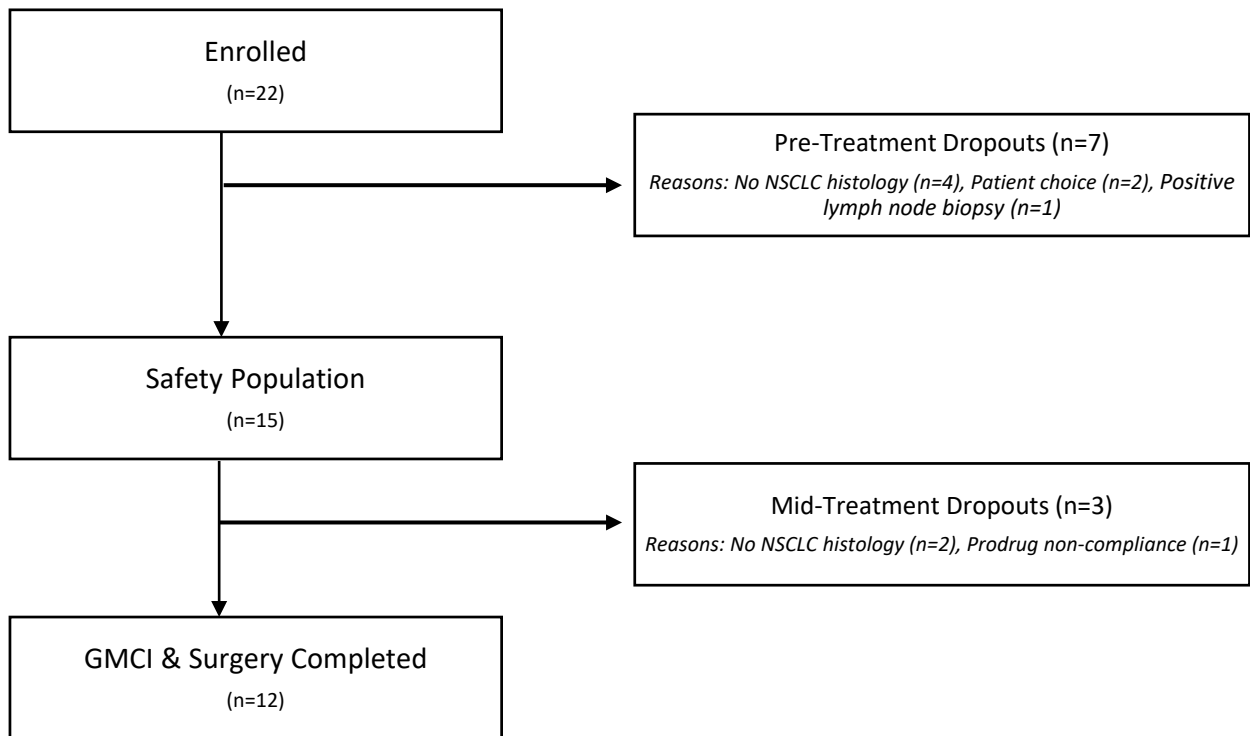

# Supplementary Figure 2

## Example of Cell Markers on Tumor Cells

3LU13P

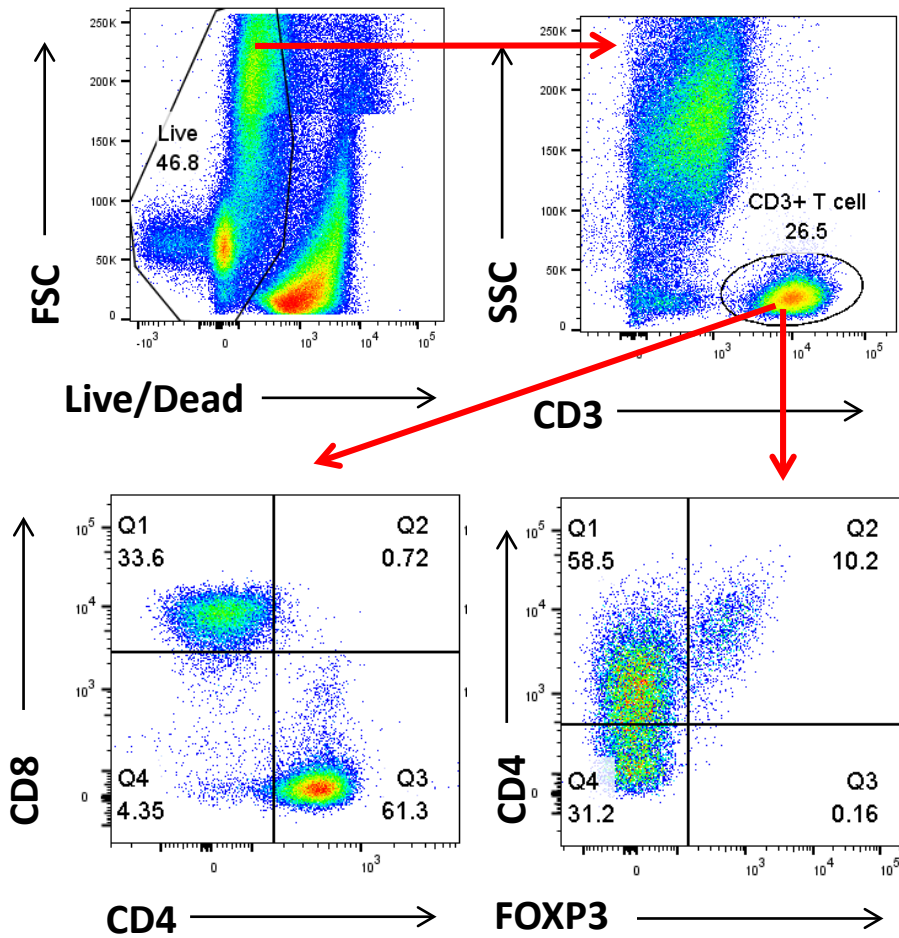

Supplementary Figure 3.  
Example of Activation Receptors on CD8 TILs

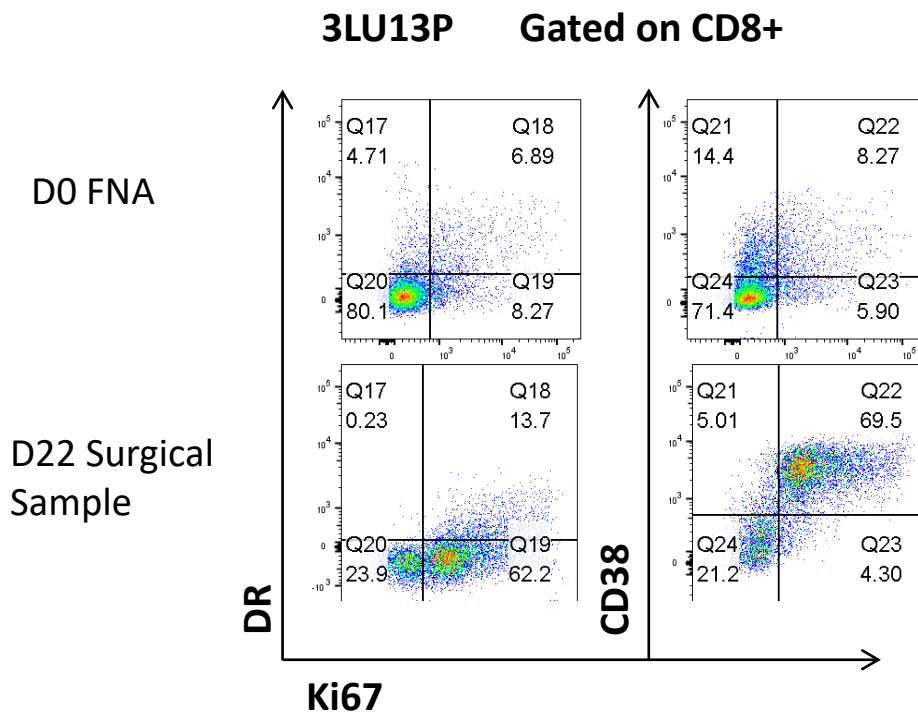

Supplementary Figure 4.  
Example of Inhibitory Receptors on TILs

3LU13P Gated on CD8+

D0 FNA

D22 Surgical  
Sample

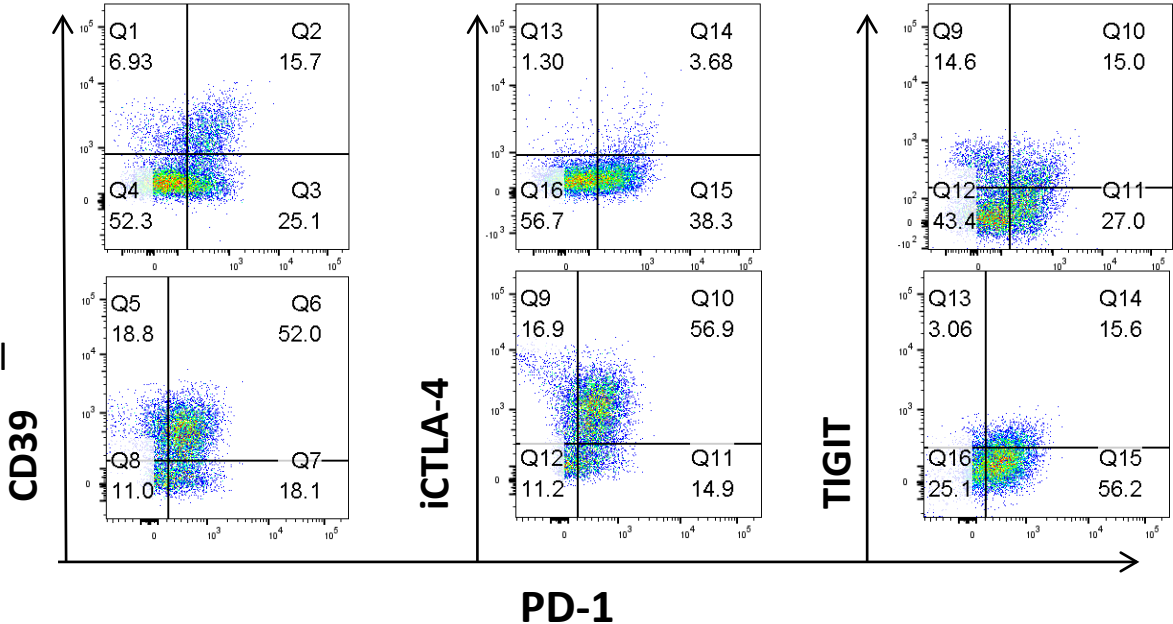

Supplemental Figure 5. TIL cytokine production after stimulation

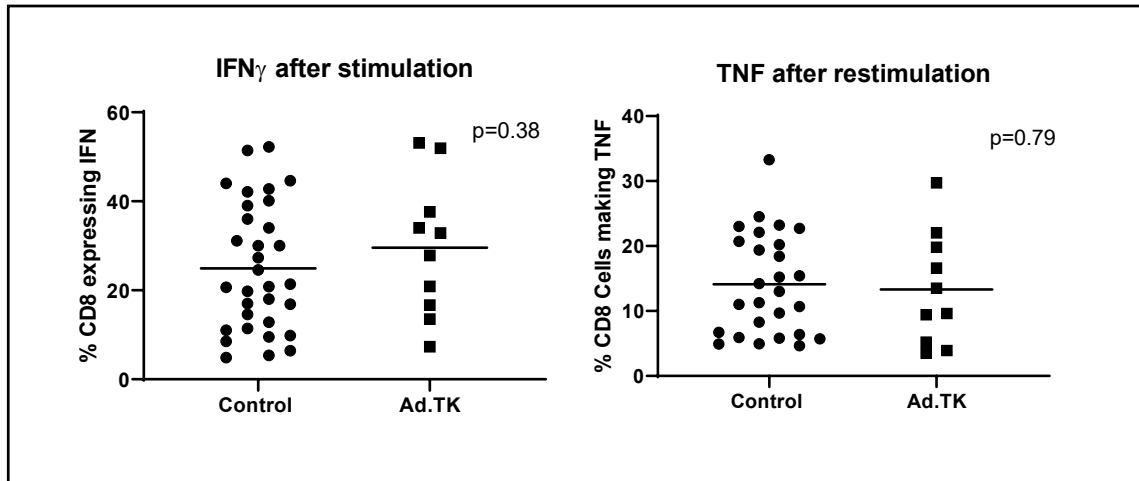

Supplemental Figure 6: Expression Level of PDL1 on tumors as assessed by IHC

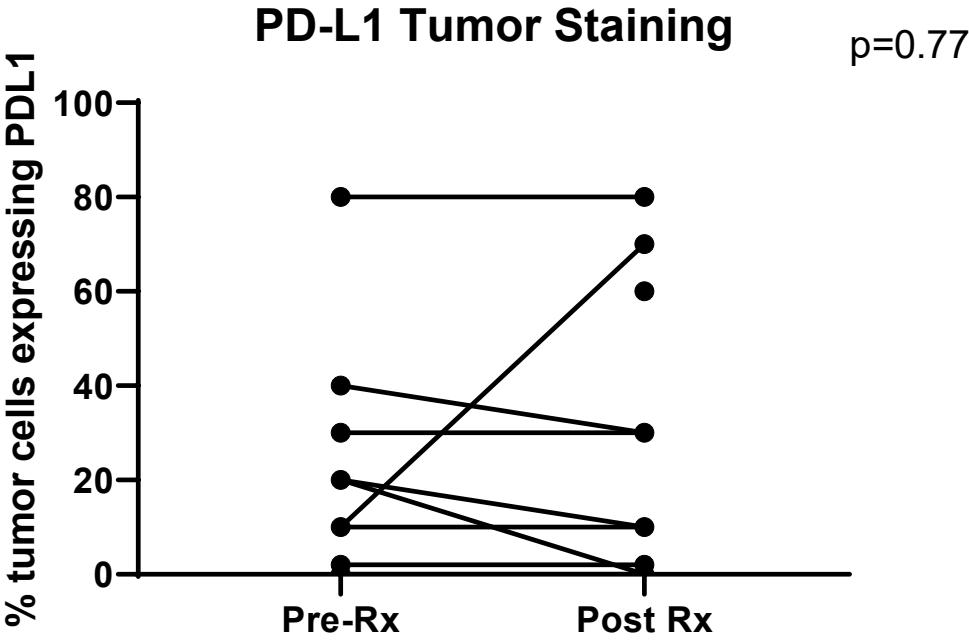

# Supplemental Figure 7. Inhibitory Receptor Expression on CD8+ cells from Patient 3LU13P PBMC

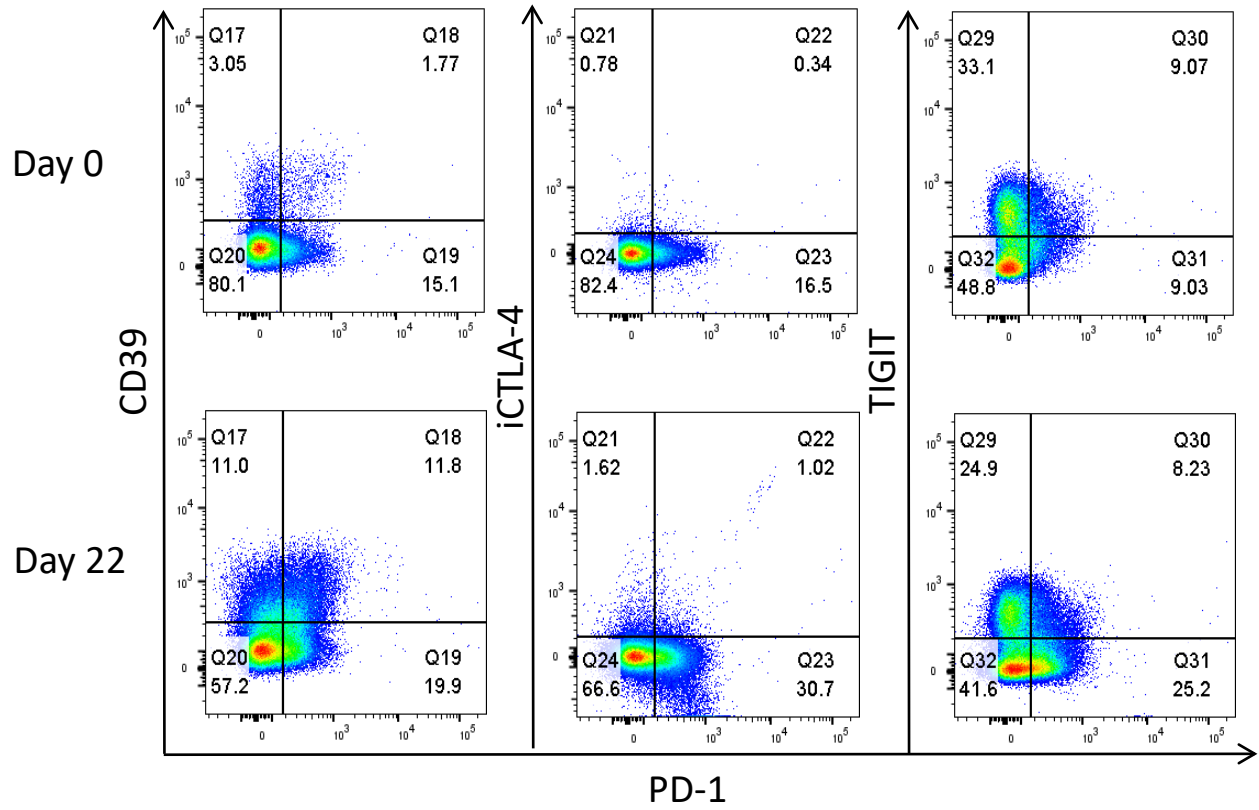



# Supplemental Figure 8. Comparison of PBMC Activation Markers with other Ad Trials

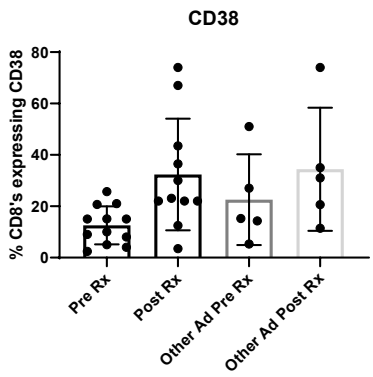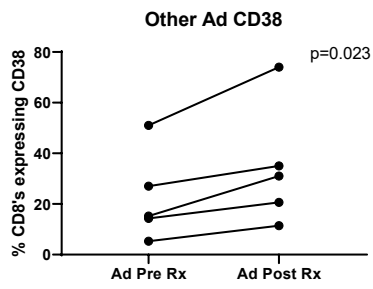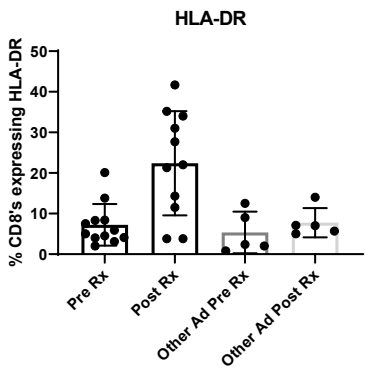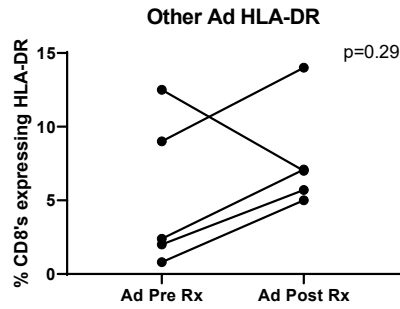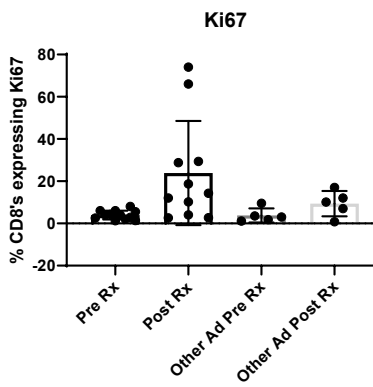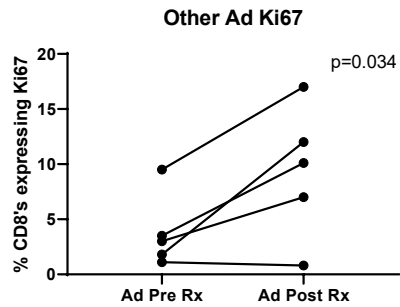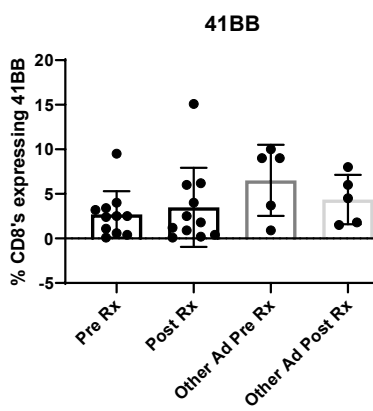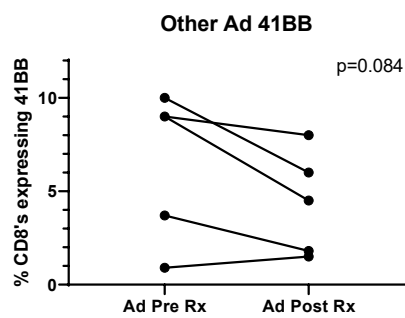

# Supplemental Figure 9. Comparison of PBMC Inhibitory Receptors with other Ad Trials

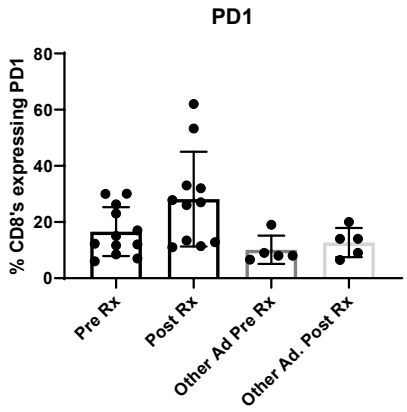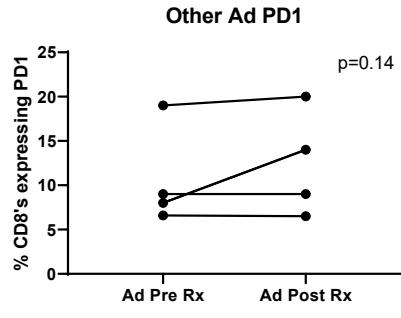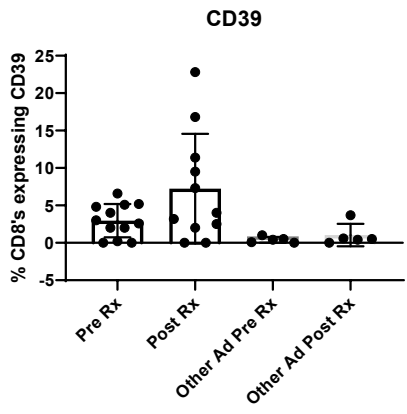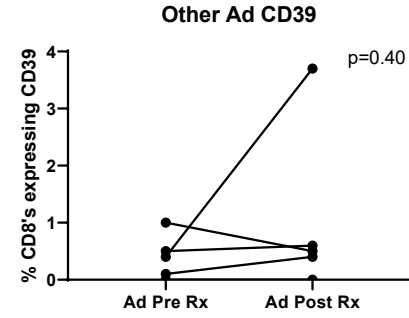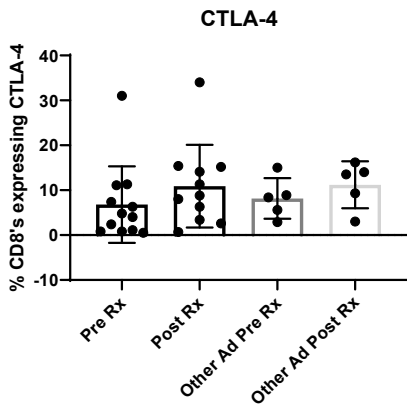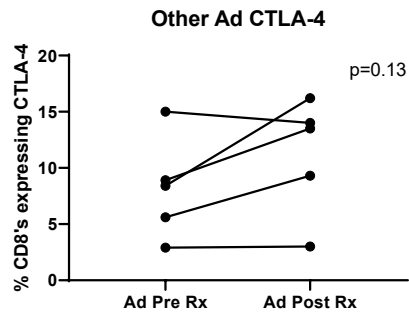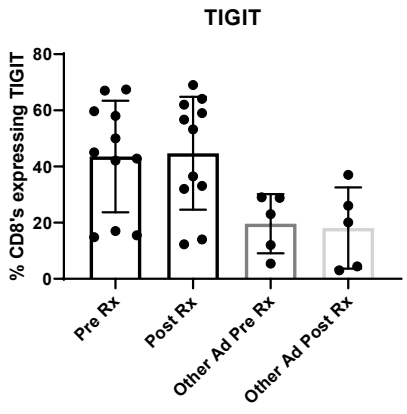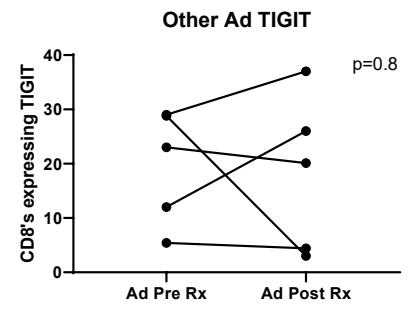

# Supplemental Figure 10. Immunoblots before and after Ad.TK

1LU02P No change

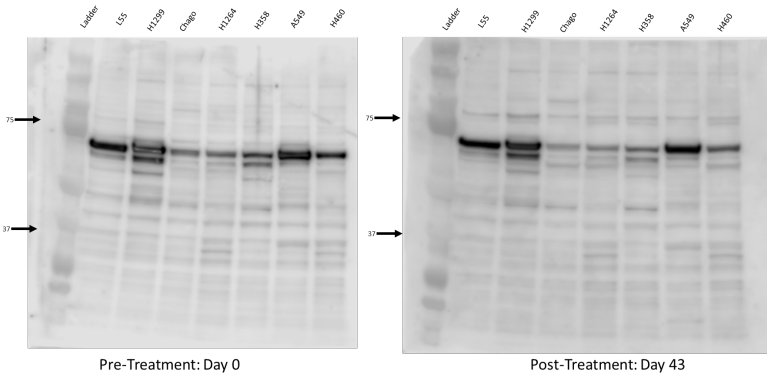

1LU04P No change

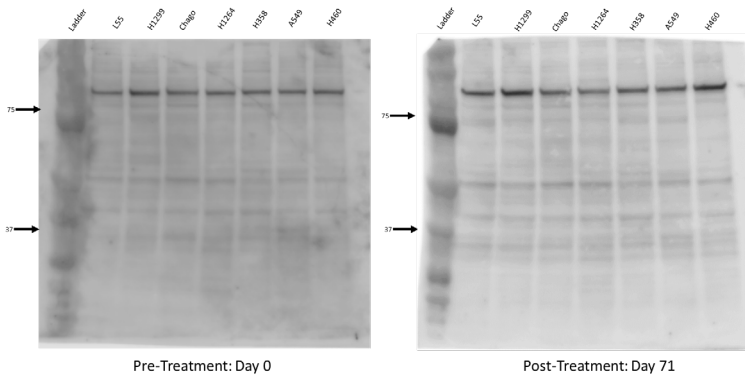

2LU01P Some new bands

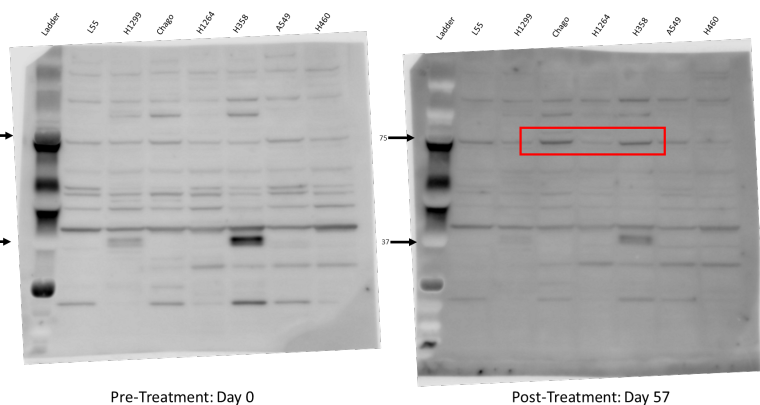

2LU02P No change

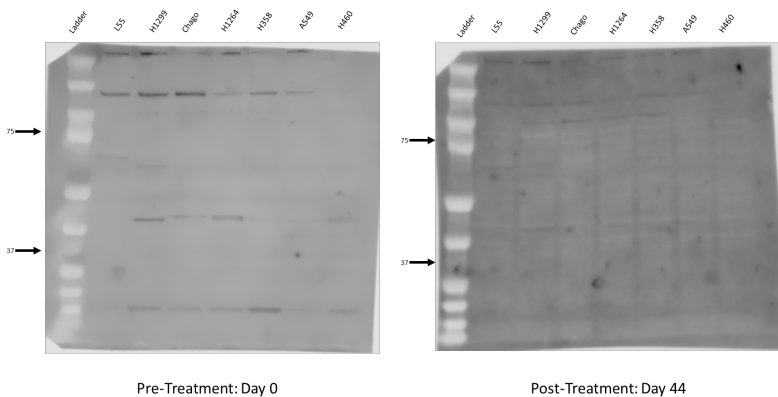

2LU04P Some new bands

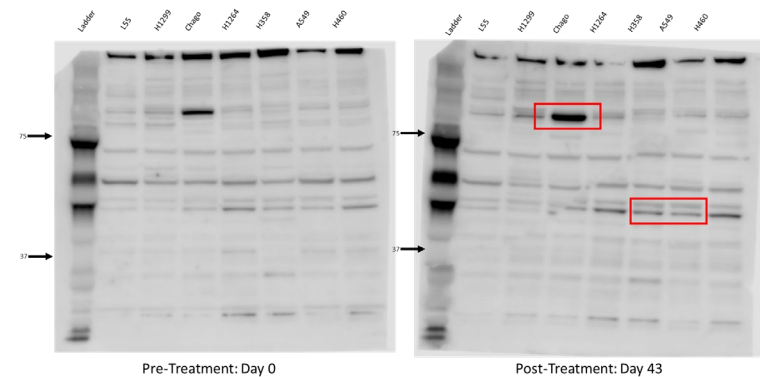

3LU02P Some new bands

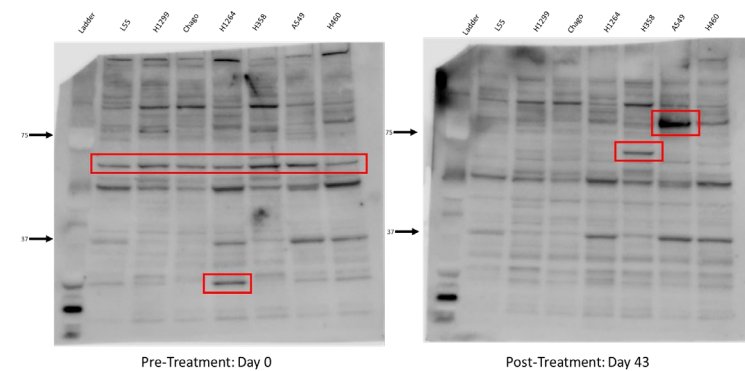

3LU06P No change

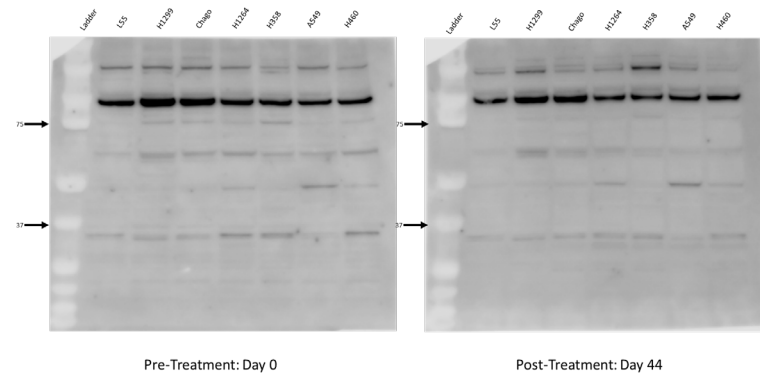

3LU08P No change

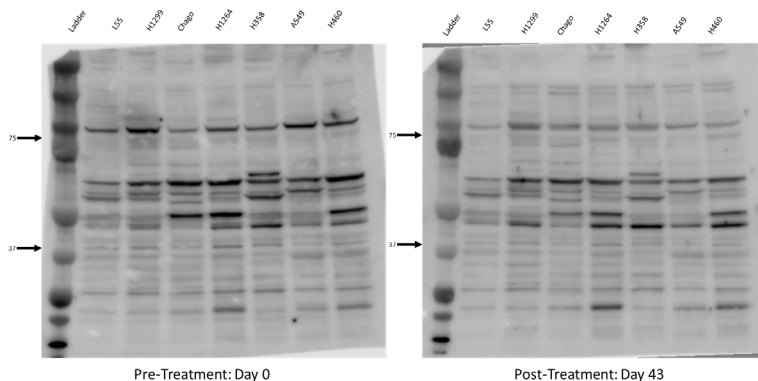

## **Supplemental Figure Legends**

### **Supplemental Figure 1. Consort Diagram of the Phase 1 Trial**

Twenty-two subjects met inclusion criteria and were enrolled in the Phase I trial. Seven patients were excluded before vector instillation (see- Pre-treatment Dropout box for reasons) and did not receive AdV-tk. Three patients were excluded after receiving AdV-tk (see Mid-treatment Dropout box for reasons). Twelve patients completed the trial. Three subjects received  $2.5 \times 10^{11}$  vp of AdV-tk (Cohort 1), 3 subjects received  $5.0 \times 10^{11}$  vp (Cohort 2), and 6 received  $1.0 \times 10^{12}$  vp (Cohort 3).

**Supplemental Figure 2.** Flow Cytometry Tracings Showing the Gating Strategy for Lymphocyte Analysis in tumors and blood. Tumor digest from Patient 3LU13P was examined for forward scatter (FSC) versus a live/dead stain (upper left tracing). Live cells were gated and examined for side scatter (SSC) versus expression of CD3 to identify T cells (circle in upper right tracing). CD3+ cells were gated and stained for CD8 and CD4 cells (lower left tracing). CD3 cells were gated and stained for CD4 and FOXP3 to identify T-regulatory cells (upper right quadrant).

**Supplemental Figure 3.** Flow Cytometry Tracings showing Activation Markers on CD8+ TILs from Patient 3LU13P. Examples of flow tracings from the CD8+ T cells of pre-treatment (Day 0, upper 3 tracings) and post-treatment (D21, lower 3 tracings) from one patient (3LU13P) are shown. Expression of HLA-DR (DR), Ki67, and CD38 are shown as marked.

**Supplemental Figure 4.** Flow Cytometry Tracings showing Inhibitory Markers on CD8+ TILs from Patient 3LU13P. Examples of flow tracings from the CD8+ T cells of pre-treatment (Day 0, upper 3 tracings) and post-treatment (D21, lower 3 tracings) from one patient (3LU13P) are shown. Expression of PD1, CD39, CTLA4, and TIGIT are shown as marked.

#### **Supplemental Figure 5. TIL activation**

T cells isolated from each surgical sample were stimulated overnight with brefeldin/monensin and plate-bound anti-CD3 antibody and subjected to flow cytometry to detect intracellular cytokine production. The percent of CD8+ T cells expressing cytokine is plotted. No differences in the ability of the CD8+ TILs to produce intracellular IFN- $\gamma$  or TNF- $\alpha$  were noted in the samples from this trial (AdV-tk) when compared to the CD8+ T cells from the early stage lung cancer patients (student t-test) (see Figure 2 population called Control).

**Supplemental Figure 6:** Expression Level of PDL1 on tumors as assessed by IHC. To determine if GCMI would upregulate the expression of PD-L1, a pre-treatment biopsy (when enough cells were present) and the surgical specimen after the treatment were stained for PD-L1 and the extent of tumor cells expressing membranous staining for PD-L1 was assessed by a pathologist (C.D.). We were able to assess staining in 8 pairs of samples. Paired t-tests were applied to define the statistical significance (p value) of the change.

**Supplemental Figure 7.** Flow Cytometry Tracings showing Inhibitory Markers on CD8+ Cells in PBMC from Patient 3LU13P. Examples of flow tracings from the CD8+ T cells of pre-treatment (Day 0, upper 3 tracings) and post-treatment (D21, lower 3 tracings) from the PBMCs from one patient (3LU13P) are shown. Expression of PD1, CD39, CTLA4, and TIGIT are shown as marked.

**Supplemental Figure 8. Comparison of PBMC Activation Markers with other Adenoviral Vector Trials**

CD8+ T cell activation changes in this trial were compared to 5 samples from two previous clinical trials in which the same AdV-tk vector followed by valacyclovir was injected intrapleurally in patients with malignant pleural effusions (3 patients) and a trial in which a similar replication-deficient type 5 Adenovirus encoding interferon alpha (IFN- $\alpha$ ) was injected intrapleurally into patients with malignant mesothelioma (2 patients). Thawed PBMCs from the 5 patients before the delivery of the vector and then again 14 days later were analyzed using the same flow cytometry protocol as used for the this AdV-tk trial. The percentage of CD8+ T cells expressing each activation marker is plotted. In the right hand panels, “Pre Rx” = values from current neoadjuvant AdV-TK trial before vector instillation; “Post Rx” = values obtained at the time of surgery in the current trial; “Other Ad Pre Rx” = values from previous AdV-TK trials before vector instillation; “Other Ad Post Rx” = values from previous AdV-TK trials 2 weeks after vector instillation. In the right hand panels, the pre- and post-Rx values from the previous trials are compared. Paired t-tests were applied to define the statistical significance (p value) of the change. The following activation markers were assessed: CD38, HLA-DR, Ki67, and 41BB (CD137).

**Supplemental Figure 9.** Comparison of PBMC Inhibitory Receptors with other Ad Trials

Left hand panels: The percent of PBMC-derived CD8 T cells expressing PD1, CD39, CTLA-4, and TIGIT from pre-treatment and post-treatment (day of surgery) data from the current trial samples (first two bars) are compared with the pre- and post-vector PBMC CD8+ T cell data from two previous clinical trials in which we injected intrapleurally the same AdV-tk vector followed by valacyclovir (3 patients) into patients with malignant pleural effusions and a trial in which a similar replication-deficient type 5 Adenovirus encoding interferon alpha (IFN- $\alpha$ ) was injected intrapleurally into patients with malignant mesothelioma (2 patients) (3<sup>rd</sup> and 4<sup>th</sup> bars).

Right hand panels: The changes in the percent of PBMC-derived CD8+ T cells expressing PD1, CD39, CTLA-4, and TIGIT from the from two previous clinical trials for each patient are plotted. None of these changes were significant by paired t-tests.

**Supplemental Figure 10.** Immunoblots before and after AdV-tk. We used pre-AdV-tk injection serum and 4-6 weeks post-resection serum to perform immunoblots on gels containing 7 different human lung cancer cells lines. Samples were available from 8 subjects. New or increased bands are shown in red boxes (in 3 of the 8 subjects).

## Supplemental Information

**Suppl. Table 1. Single cell surface and intracellular markers used in the study**

| <b>Antibody</b> | <b>Clone</b> | <b>Source</b>  |
|-----------------|--------------|----------------|
| CD103           | Ber-Act8     | Biolegend      |
| CD137 (41BB)    | 4B4-1        | Biolegend      |
| CD3             | UCHT1, SK7   | Biolegend      |
| CD38            | HIT2         | Biolegend      |
| CD39            | A1           | Biolegend      |
| CD4             | OKT4         | Biolegend      |
| CD8             | RPA-T8       | BD Biosciences |
| CTLA-4          | BNI3         | BD Biosciences |
| FoxP3           | 206D         | Biolegend      |
| HLA-DR          | G46-6        | BD Biosciences |
| IFN- $\gamma$   | 4S.B3        | Biolegend      |
| Ki67            | 20Raj1       | eBioscience    |
| PD-1            | EHI2-H7      | Biolegend      |
| PD-L1           | M1H1         | Biolegend      |
| TIGIT           | MBAS43       | eBioscience    |
| TIM-3           | F38-232      | Biolegend      |
| TNF- $\alpha$   | Mab11        | Biolegend      |
|                 |              |                |





| Adverse Event                                       | Time period 1 |       |       | Time period 2 |       |       | Time period 3 |       |       |
|-----------------------------------------------------|---------------|-------|-------|---------------|-------|-------|---------------|-------|-------|
|                                                     | CTC 1         | CTC 2 | CTC 3 | CTC 1         | CTC 2 | CTC 3 | CTC 1         | CTC 2 | CTC 3 |
| <b>Metabolism and nutrition</b>                     |               |       |       |               |       |       |               |       |       |
| Anorexia                                            |               |       |       | 1             |       |       | 2             | 1     |       |
| Diabetes Mellitus Exacerbation                      |               |       |       |               |       |       |               |       | 1     |
| Hyperglycemia                                       |               |       |       |               |       |       |               |       | 1     |
| Severe protein-calorie malnutrition                 |               |       |       |               |       |       |               |       | 1     |
| <b>Musculoskeletal</b>                              |               |       |       |               |       |       |               |       |       |
| Back pain                                           |               |       |       |               | 1     |       |               |       |       |
| Crepitus                                            |               |       |       |               |       |       | 1             |       |       |
| Muscle spasms                                       |               |       |       |               |       |       | 1             |       |       |
| <b>Nervous system disorders</b>                     |               |       |       |               |       |       |               |       |       |
| Dysgeusia                                           |               |       |       | 1             |       |       |               |       |       |
| Headache                                            |               |       | 1     |               |       |       |               |       | 1     |
| Paresthesia                                         |               |       |       | 1             |       |       |               |       |       |
| Tremor                                              |               |       |       |               |       |       |               | 1     |       |
| <b>Psychiatric disorders</b>                        |               |       |       |               |       |       |               |       |       |
| Agitation                                           |               |       |       |               |       |       | 1             |       |       |
| Anxiety                                             |               |       |       | 1             |       |       | 2             |       |       |
| Insomnia                                            |               |       |       | 1             |       |       |               |       |       |
| <b>Renal and urinary disorders</b>                  |               |       |       |               |       |       |               |       |       |
| Urinary retention                                   |               | 1     |       |               |       |       |               | 2     |       |
| <b>Respiratory, thoracic, mediastinal disorders</b> |               |       |       |               |       |       |               |       |       |
| Bronchopleural fistula                              |               |       |       |               |       |       |               |       | 1     |
| Cough                                               |               |       |       | 4             |       |       | 1             |       |       |
| Crackles                                            | 1             |       |       |               |       |       |               |       |       |
| Dyspnea                                             |               |       |       | 3             |       |       | 2             | 1     |       |
| Hemoptysis                                          |               |       |       | 1             |       |       |               |       |       |
| Hypoxia                                             |               |       |       |               |       |       |               | 2     |       |
| Nasal congestion                                    |               |       |       | 1             |       |       |               |       |       |
| Pneumothorax                                        |               |       |       |               |       |       | 2             |       |       |
| Subcutaneous emphysema                              |               |       |       |               |       |       | 2             |       |       |
| Wheezing                                            |               |       |       | 1             |       |       |               |       |       |
| <b>Surgical and medical procedures</b>              |               |       |       |               |       |       |               |       |       |
| Surgical pain                                       |               |       |       |               |       |       | 1             |       |       |
| <b>Vascular disorders</b>                           |               |       |       |               |       |       |               |       |       |
| Hypotension                                         |               | 1     |       |               |       |       | 1             | 1     |       |

**Supplemental Table 3. Laboratory Abnormalities**

| Lab Abnormality      | Post-Injection |       | Post-Surgery |       |
|----------------------|----------------|-------|--------------|-------|
|                      | CTC 1          | CTC 3 | CTC 1        | CTC 2 |
| Elevated AST/ALT     | 1              |       |              |       |
| Elevated Bilirubin   | 1              |       |              |       |
| Elevated Creatinine  | 1              |       | 1            |       |
| Elevated Potassium   | 1              |       |              |       |
| Elevated Sodium      | 1              |       |              |       |
| Low Albumin          | 2              |       | 1            |       |
| Low Calcium          | 1              |       | 9            |       |
| Low Hemoglobin       | 2              |       | 7            | 2     |
| Low Leukocytes (WBC) |                |       | 1            |       |
| Low Lymphocytes      | 2              | 2     | 2            | 1     |
| Low Platelets        | 3              |       | 1            |       |
| Low Potassium        |                |       | 1            |       |
| Low Sodium           | 2              |       | 3            |       |

**Supplemental Table 4.** All SAEs reported.

Time period 3 corresponds to the day of surgery to 4 weeks post-surgery.

| PCN    | Category                                        | AE Name                        | Time Period | Time since injection of SAE (weeks) | CTC Grade | Relation  |
|--------|-------------------------------------------------|--------------------------------|-------------|-------------------------------------|-----------|-----------|
| 1LU04P | Infections and infestations                     | Skin infection                 | 3           | 3.1                                 | 3         | Unrelated |
| 2LU01P | Cardiac disorders                               | Heart failure                  | 3           | 5.3                                 | 3         | Unrelated |
| 3LU01P | Respiratory, thoracic and mediastinal disorders | Bronchopleural fistula         | 3           | 6.3                                 | 3         | Unrelated |
| 3LU05P | Metabolism and nutrition disorders              | Diabetes Mellitus Exacerbation | 3           | 3.4                                 | 3         | Unrelated |

Supplemental Table 5. Patient data related to Recurrence

| Patient ID | Histology | Final TNM     | Surgical Staging | Adjuvant Treatment | Recurrence | Time to recurrence (mos) | Date of surgery | Last Time of Contact | Median time of follow-up (mos) |
|------------|-----------|---------------|------------------|--------------------|------------|--------------------------|-----------------|----------------------|--------------------------------|
| 1LU02      | SCC       | T3N2          | IIIB             | Yes                | Yes        | 26                       | 6/19/2017       | 1/9/2020             | 32                             |
| 1LU04      | SSC       | T2aN0         | IB               | Yes                | NED        |                          | 11/14/2017      | 10/2/2019            | 23                             |
| 1LU05      | SSC       | T2bN1         | IIB              | Yes                | NED        |                          | 12/12/2017      | 1/9/2020             | 25                             |
| 2LU01      | SCC       | T4N0          | IIIA             | Yes                | NED        |                          | 3/8/2018        | 5/19/2020            | 14                             |
| 2LU02      | Adeno     | T2aN0         | IB               | Unknown            | Yes        | 24                       | 5/4/2018        | 6/17/2020            | 26                             |
| 2LU04      | SSC       | T2aN0         | IB               | No                 | NED        |                          | 6/5/2018        | 5/20/2020            | 24                             |
| 3LU01      | SCC       | T3N2          | IIIB             | Yes                | Yes        | 6                        | 8/3/2018        | 12/30/2019           | 17.7                           |
| 3LU02      | Sarco     | T4N0          | IIIA             | Yes                | NED        |                          | 9/21/2018       | 2/29/2020            | 17                             |
| 3LU06      | Adeno     | T3N2,<br>T1N2 | IIIB             | Yes                | NED        |                          | 2/5/2019        | 5/21/2020            | 15                             |
| 3LU08      | SCC       | T3N0          | IIB              | No                 | NED        |                          | 4/5/2019        | 1/29/2020            | 10                             |
| 3LU12      | Adeno     | T1N0          | IA               | Unknown            | NED        |                          | 10/29/2019      | 5/20/2020            | 7.5                            |
| 3LU13      | Adeno     | T3N0          | IIB              | Yes                | NED        |                          | 10/29/2019      | 5/13/2020            | 7.5                            |
